# Supplementary material
Source: publisher figshare collection journal article supplement (https://adisjournals.figshare.com/ndownloader/files/34277615)

# Rapidity of Improvement in Signs/Symptoms of Moderate-to-Severe Atopic Dermatitis by Body Region with Abrocitinib in Phase 3 JADE COMPARE

Andrew Alexis, Marjolein de Bruin-Weller, Stephan Weidinger, Weily Soong, Sebastien Barbarot, Ileana Ionita, Fan Zhang, Hernan Valdez, Claire Clibborn, Natalie Yin

## Changes in EASI in Different Body Regions

EASI Regional Score  
(least squares mean  
% change from baseline)

Median Time to  
EASI-75, days

Week 2

Week 16

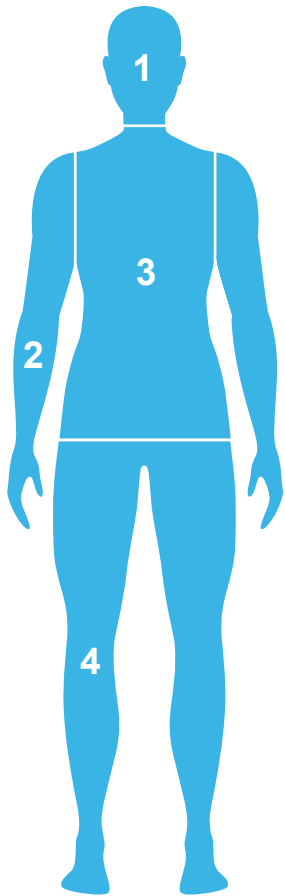

1  
Head and neck

2  
Upper limbs

3  
Trunk

4  
Lower limbs

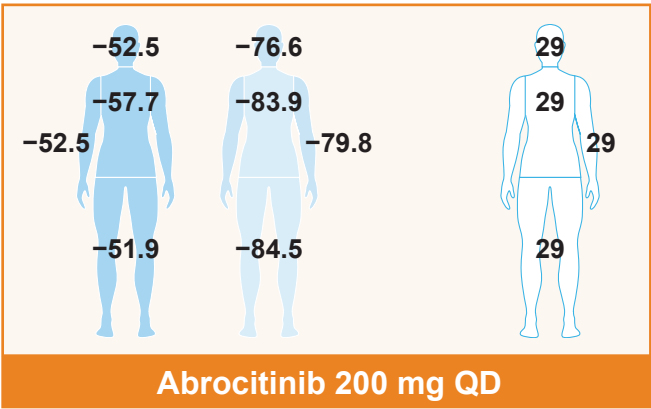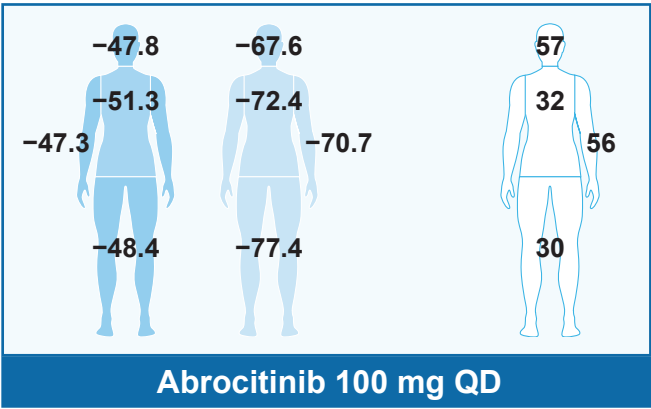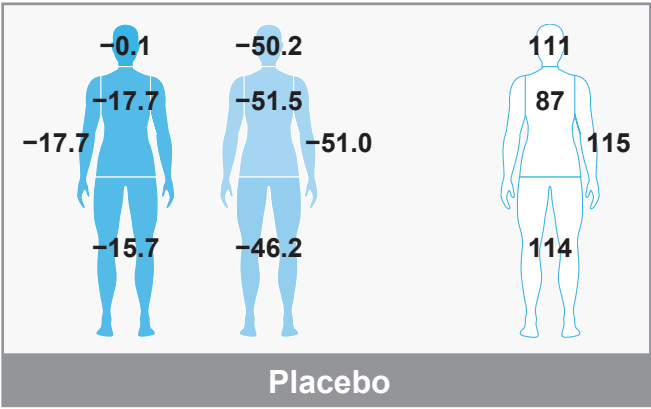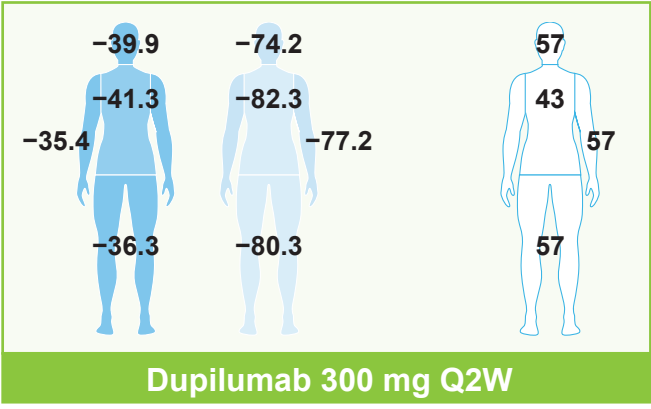

Supplement: Supplementary file 1 [file 34277615]
